# Supplementary material
Source: publisher site journal article supplement (https://www.degruyterbrill.com/publication/isbn/9783110289930/downloadAsset/9783110289930_Inhaltsverzeichnis.pdf)
Supplement: Supplementary file 1 [file 9783110289930_Inhaltsverzeichnis.pdf]

# Inhaltsverzeichnis

|                                                                         |     |
|-------------------------------------------------------------------------|-----|
| Vorwort                                                                 | X   |
| 1. Einführung                                                           | 1   |
| 1.1 Beobachtungen und Fragen – Ansatz der Arbeit                        | 1   |
| 1.2 Der Weg zu den Antworten – Aufbau der Arbeit                        | 6   |
| 1.3 Korpusanalyse – eine Grundlage der Arbeit                           | 8   |
| 2. Eigenschaften von PVK – Grenzgänge in Theorie und Praxis             | 11  |
| 2.1 Distanz und Adjazenz zwischen Verb und Partikel                     | 12  |
| 2.2 Erfragbarkeit und Modifizierbarkeit der Partikeln                   | 18  |
| 2.3 Lexikalisierung                                                     | 21  |
| 2.4 In- und externe Valenz der PVK                                      | 25  |
| 3. Kompositionalität – Vom Wort zur Syntax?                             | 29  |
| 3.1 Adjunktion der Partikel als Modifikator                             | 30  |
| 3.2 Funktionale Applikation                                             | 31  |
| 3.3 Das Lizenzierungsproblem                                            | 36  |
| 3.4 Funktionale Komposition – virtuelle Lösung                          | 41  |
| 3.5 PVK-Bildung als Umperspektivierung der verbalen Argumente           | 44  |
| 3.6 Das Problem <i>der</i> verbalen Argumentstruktur als operabler Wert | 47  |
| 3.7 Partikelschablonen und Verben                                       | 50  |
| 3.8 Konstruktionsgrammatische Analyse                                   | 53  |
| 3.8.1 Fusion zwischen Verben und Argumentkonstruktionen                 | 55  |
| 3.8.2 Die Rolle der Partikeln in den Argumentkonstruktionen             | 60  |
| 4. Was bedeutet Konstruktionsgrammatik?                                 | 62  |
| 4.1 Der Konstruktionsbegriff                                            | 69  |
| 4.2 Formale Komplexität                                                 | 71  |
| 4.3 Semantische Allgemeinheit                                           | 72  |
| 4.4 Kompositionalität und Transparenz                                   | 73  |
| 4.5 Produktivität                                                       | 76  |
| 4.6 Kern- und Randbereich                                               | 79  |
| 5. Verblexeme                                                           | 82  |
| 5.1 Frame-Semantik – Hintergründe                                       | 82  |
| 5.2 Repräsentation von Verblexemen in Frame-Strukturen                  | 88  |
| 5.2.1 Frame-semantische Analyse von „tanzen“                            | 93  |
| 5.2.2 Syntaktischer Gebrauch von „tanzen“                               | 96  |
| 5.3 Profile: semantisch-syntaktische Ausschnitte                        | 100 |

|       |                                                                   |     |
|-------|-------------------------------------------------------------------|-----|
| 6.    | Argumentkonstruktionen mit „an“                                   | 104 |
| 6.1   | Partikelverben mit „an“ in der Literatur                          | 104 |
| 6.2   | Differenzierung zwischen Homonymie und Polysemie                  | 108 |
| 6.3   | Konstruktionsgrammatische Analysen von Polysemie                  | 111 |
| 6.4   | Metonymische Objektvarianz – motivierte Gleichheit der Form       | 115 |
| 6.5   | Notation der Zuordnung zwischen Form und Bedeutung                | 119 |
| 6.5.1 | Bedeutungsseite                                                   | 120 |
| 6.5.2 | Perspektive und semantische Proto-Rollen                          | 122 |
| 6.5.3 | Formseite                                                         | 124 |
| 6.6   | Konstituenz – flach oder /und binär?                              | 126 |
| 7.    | Einzelne Argumentkonstruktionen mit „an“                          | 131 |
| 7.1   | Konstruktionen zum Ausdruck von Orts- und Zustandsveränderung     | 132 |
| 7.1.1 | Exkurs: Endoreflexive und unkausative Medial-PVK                  | 139 |
| 7.2   | Konstruktion zum Ausdruck der Inbetriebnahme                      | 142 |
| 7.2.1 | Exkurs: Lexikalisierung der Partikel                              | 143 |
| 7.3   | Konstruktion zum Ausdruck eines Kontaktzustandes                  | 145 |
| 7.4   | Konstruktionen zum Ausdruck von Intensivierung                    | 146 |
| 7.4.1 | Exkurs: Ein- und Abgrenzungsprobleme von PVK                      | 149 |
| 7.5   | Konstruktionen zum Ausdruck gerichteter Tätigkeiten               | 151 |
| 7.5.1 | Exkurs: Partikeln als konstruktionsgebundene Marker               | 153 |
| 7.6   | Konstruktion zum Ausdruck einer Kraft-Gegenkraft-Relationen       | 156 |
| 7.7   | Konstruktionen zum Ausdruck von Partialität                       | 156 |
| 7.8   | Konstruktion zum Ausdruck der Wahrnehmung von etwas an jemandem   | 160 |
| 8.    | Das System der Argumentkonstruktionen und PVK mit „an“            | 162 |
| 8.1   | Bedeutungsgruppen der PVK mit „an“                                | 162 |
| 8.2   | Argumentkonstruktionen mit „an“ nach Anzahl ihrer Instanzen       | 165 |
| 8.3   | Funktion der Partikel in Bezug auf die Gesamtzahl der PVK         | 168 |
| 8.4   | Funktion der Argumentkonstruktionen                               | 169 |
| 8.5   | Vererbungsrelationen als System ökonomischer Repräsentation       | 171 |
| 8.5.1 | Vererbung zwischen Konstruktionen als Subparts von Konstruktionen | 172 |
| 8.5.2 | Vererbung zwischen Konstruktionen und lexikalischen Instanzen     | 174 |
| 8.5.3 | Metaphorische Vererbung                                           | 176 |
| 8.5.4 | Mehrfache Vererbung                                               | 176 |
| 8.5.5 | Konstruktionen als Instanzen von Konstruktionen                   | 177 |
| 8.5.6 | Instanzen von Instanzen                                           | 178 |
| 9.    | Fusion und Gebrauch – Verben und Argumentkonstruktionen           | 180 |
| 9.1   | Bewegungsausdrücke – sprachtypologische Differenzen               | 180 |
| 9.2   | Virtuelle Wege als Orientierungslinien                            | 184 |
| 9.3   | Fusionsprinzipien                                                 | 186 |

|        |                                                                                   |     |
|--------|-----------------------------------------------------------------------------------|-----|
| 9.4    | Fusionen zwischen Simplicia und den Argumentkonstruktionen mit „an“               | 189 |
| 9.4.1  | Gebrauch der Konstruktion [1a]: <i>anbacken</i>                                   | 190 |
| 9.4.2  | Gebrauch der Konstruktion [1b]: <i>ankommen</i>                                   | 191 |
| 9.4.3  | Gebrauch der Konstruktion [1c]: <i>angebeult kommen</i>                           | 194 |
| 9.4.4  | Gebrauch der Konstruktion [1d]: <i>etw. ankleben</i>                              | 196 |
| 9.4.5  | Gebrauch der Konstruktion [1e]: <i>etw. anliefern</i>                             | 200 |
| 9.4.6  | Gebrauch der Konstruktion [1f]: <i>jdn. anlocken</i>                              | 201 |
| 9.4.7  | Gebrauch der Konstruktion [1g]: <i>etw. anhäufen</i>                              | 202 |
| 9.4.8  | Gebrauch der Konstruktion [1h]: <i>jdm. etw. anerzählen</i>                       | 203 |
| 9.4.9  | Gebrauch der Konstruktionen [1h']: <i>sich etw. anlesen/ sich einen antrinken</i> | 204 |
| 9.4.10 | Gebrauch der Konstruktion [1i]: <i>etw. einer Sache angleichen</i>                | 205 |
| 9.4.11 | Gebrauch der Konstruktion [2]: <i>etw. anschalten</i>                             | 206 |
| 9.4.12 | Gebrauch der Konstruktion [3]: <i>anliegen</i>                                    | 207 |
| 9.4.13 | Gebrauch der Konstruktionen [4a,b]: <i>ansteigen, jdn. antreiben</i>              | 207 |
| 9.4.14 | Gebrauch der Konstruktion [5a]: <i>jdn. anlächeln</i>                             | 208 |
| 9.4.15 | Gebrauch der Konstruktion [5b]: <i>anklopfen</i>                                  | 215 |
| 9.4.16 | Gebrauch der Konstruktion [6]: <i>gegen etw. ankämpfen</i>                        | 215 |
| 9.4.17 | Gebrauch der Konstruktion [7a]: <i>anrucken</i>                                   | 217 |
| 9.4.18 | Gebrauch der Konstruktion [7b]: <i>etw. anbraten</i>                              | 218 |
| 9.4.19 | Gebrauch der Konstruktion [7c]: <i>anbaden</i>                                    | 223 |
| 9.4.20 | Gebrauch der Konstruktion [8]: <i>jdm. etw. ansehen</i>                           | 224 |
| 9.5    | Gebrauchssystem                                                                   | 224 |
| 9.6    | Okkasionelle PVK mit „schlafen“ – System, Norm und Sprechen                       | 228 |
| 10.    | Ein- und Ausblick                                                                 | 234 |
|        | Anhang: PVK als Instanzen der jeweiligen Konstruktionen                           | 241 |
|        | Literaturverzeichnis                                                              | 249 |
|        | Register                                                                          | 279 |
